# Supplementary material for: Folated pH-degradable nanogels for the simultaneous delivery of docetaxel and an IDO1-inhibitor in enhancing cancer chemo-immunotherapy
Source: Royal Society of Chemistry journal article supplement (doi:10.1039/c9bm00324j), 2019-01-01
Supplement: c9bm00324j1.pdf [file c9bm00324j1.pdf]

*Supporting Information*

**Folated pH-degradable nanogels for simultaneous delivery of docetaxel and IDO1-inhibitor in enhancing cancer chemoimmunotherapy**

Haishi Qiao <sup>a</sup>, Xingmei Chen <sup>a</sup>, Enping Chen <sup>a</sup>, Junmei Zhang <sup>a</sup>, Dechun Huang <sup>a,\*</sup>, Danqi Yang <sup>a</sup>, Youchao Ding <sup>b</sup>, Hongliang Qian <sup>a</sup>, Jan Feijen <sup>c</sup>, and Wei Chen <sup>a,\*</sup>

<sup>a</sup> Department of Pharmaceutical Engineering, School of Engineering, China Pharmaceutical University, Nanjing 211198, P. R. China.

<sup>b</sup> Industrial Products Inspection Center of Nanjing Customs, Nanjing 210019, P.R. China.

<sup>c</sup> Department of Polymer Chemistry and Biomaterials, Faculty of Science and Technology, MEDTECH Centre, University of Twente, P.O. Box 217, 7500 AE Enschede, The Netherlands.

\* Corresponding authors. E-mail: [cpu hdc@cpu.edu.cn](mailto:cpu hdc@cpu.edu.cn) (D.C. Huang); [w.chen@cpu.edu.cn](mailto:w.chen@cpu.edu.cn) (W. Chen).

**Table S1** Drug loading content (LC, wt%) and loading efficiency (LE, %) of N9 and DTX into nanogels determined by HPLC.

| Samples | N9 loading |      | DTX loading |      | N9/DTX co-loading |           |
|---------|------------|------|-------------|------|-------------------|-----------|
|         | LC         | LE   | LC          | LE   | LC                | LE        |
| FA-NGs  | 7.6        | 83.4 | 5.5         | 60.1 | 7.1/5.5           | 78.1/60.1 |
| NGs     | 6.9        | 75.6 | 5.8         | 64.1 | 6.7/4.4           | 73.8/48.0 |

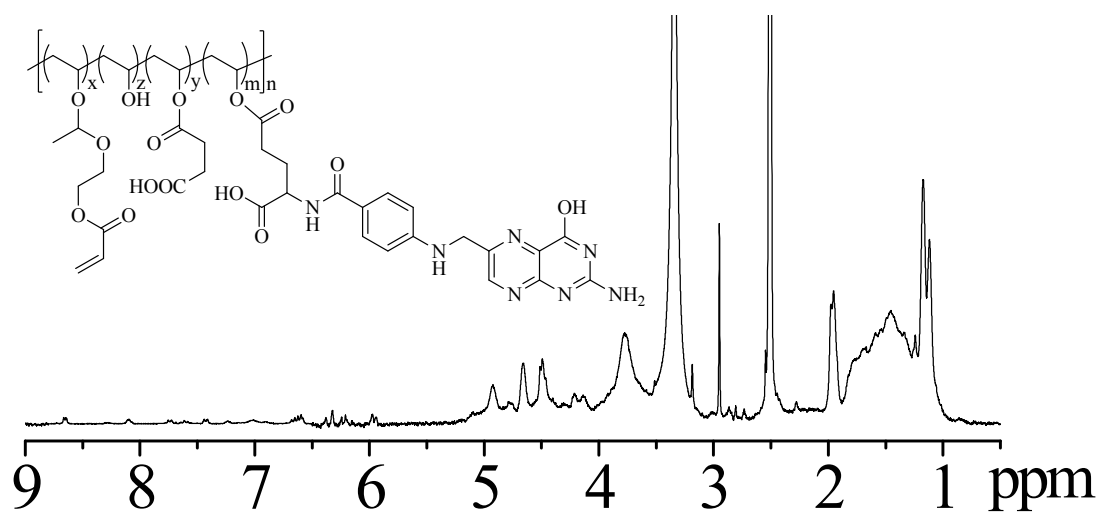

**Fig. S1**  $^1\text{H}$  NMR spectrum (300 MHz,  $\text{DMSO-}d_6$ ) of folated VEA and carboxyl functionalized PVA (FA-PVA-VEA-COOH).

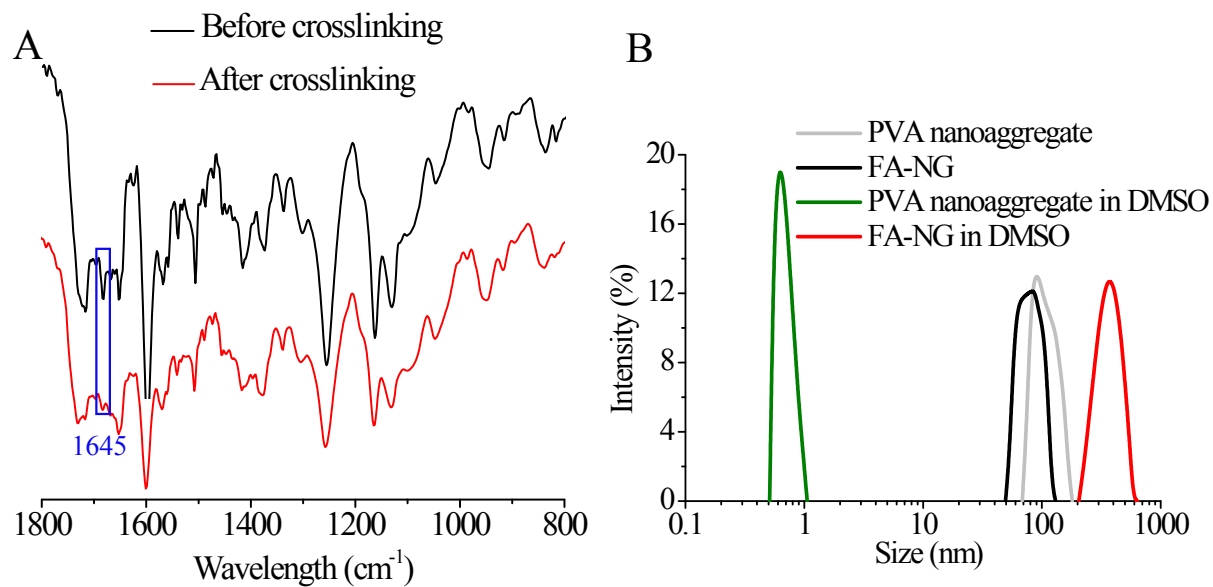

**Fig. S2** FT-IR spectra of PVA nanoparticles before and after UV-crosslinking (A), and size distribution of crosslinked and uncrosslinked PVA nanoparticles in DMSO determined by DLS (B).

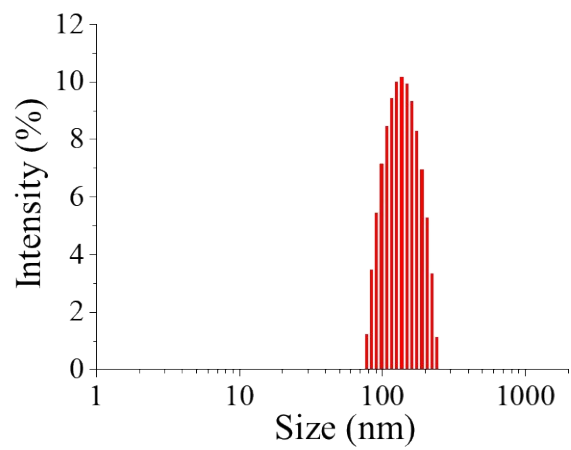

**Fig. S3** Size distribution of blank PVA nanogels (NGs) determined by DLS.

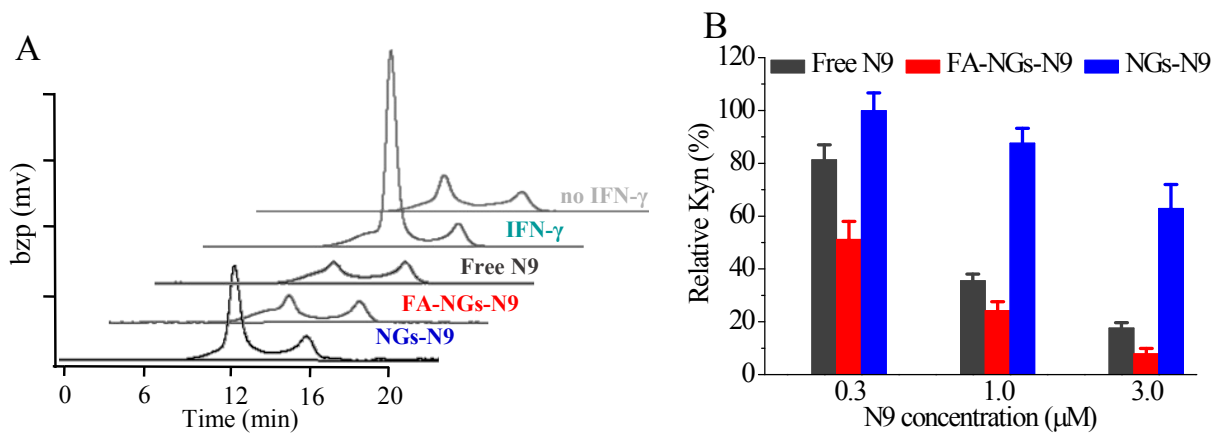

**Fig. S4** (A) HPLC spectra of Kyn production in the medium after 24 h HeLa cell incubation with different treatments: no INF- $\gamma$ , INF- $\gamma$  (75 ng/mL), free N9, FA-NGs-N9 and NGs-N9. (B) Relative amount of Kyn (%) in the cell medium according to the quantitative HPLC analysis (HeLa cells treated only with INF- $\gamma$  used as a control).

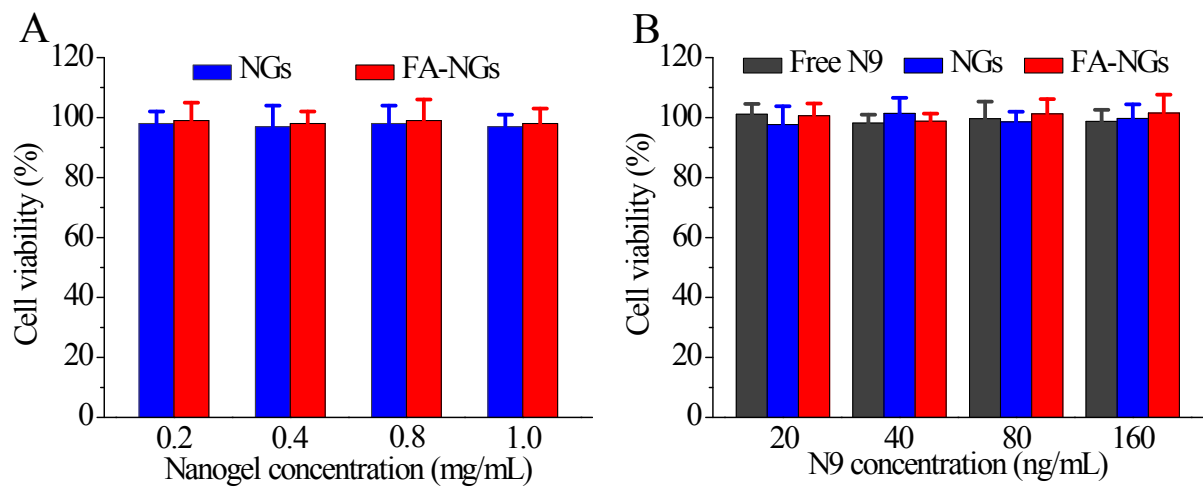

**Fig. S5** (A) Cytotoxicity effect of Nanogels determined by MTT assay using 4T1-Luc cells. (B) Cytotoxicity effect of N9 determined by MTT assay using 4T1-Luc cells.

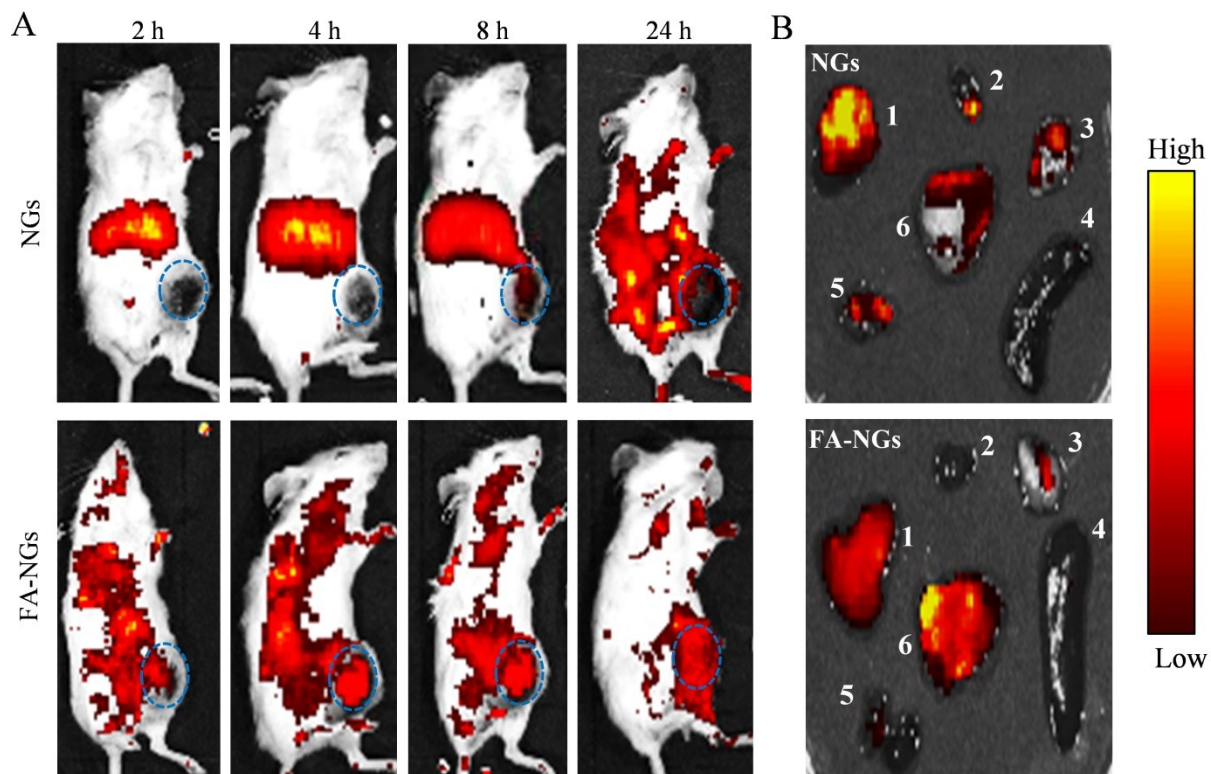

**Fig. S6** (A) In vivo fluorescence images of 4T1-Luc xenograft bearing nude mice at different time points following injection of DiR-loaded nanogels (DiR concentration: 20  $\mu\text{g}/\text{mL}$ ). The images were acquired and analyzed using Lumia II software. (B) Ex vivo fluorescence images of organs and tumors from the 4T1-Luc-bearing nude mice following 24 h postintravenous injection. 1: Liver; 2: Heart; 3: Lung; 4: Spleen; 5: Kidney; 6: Tumor.



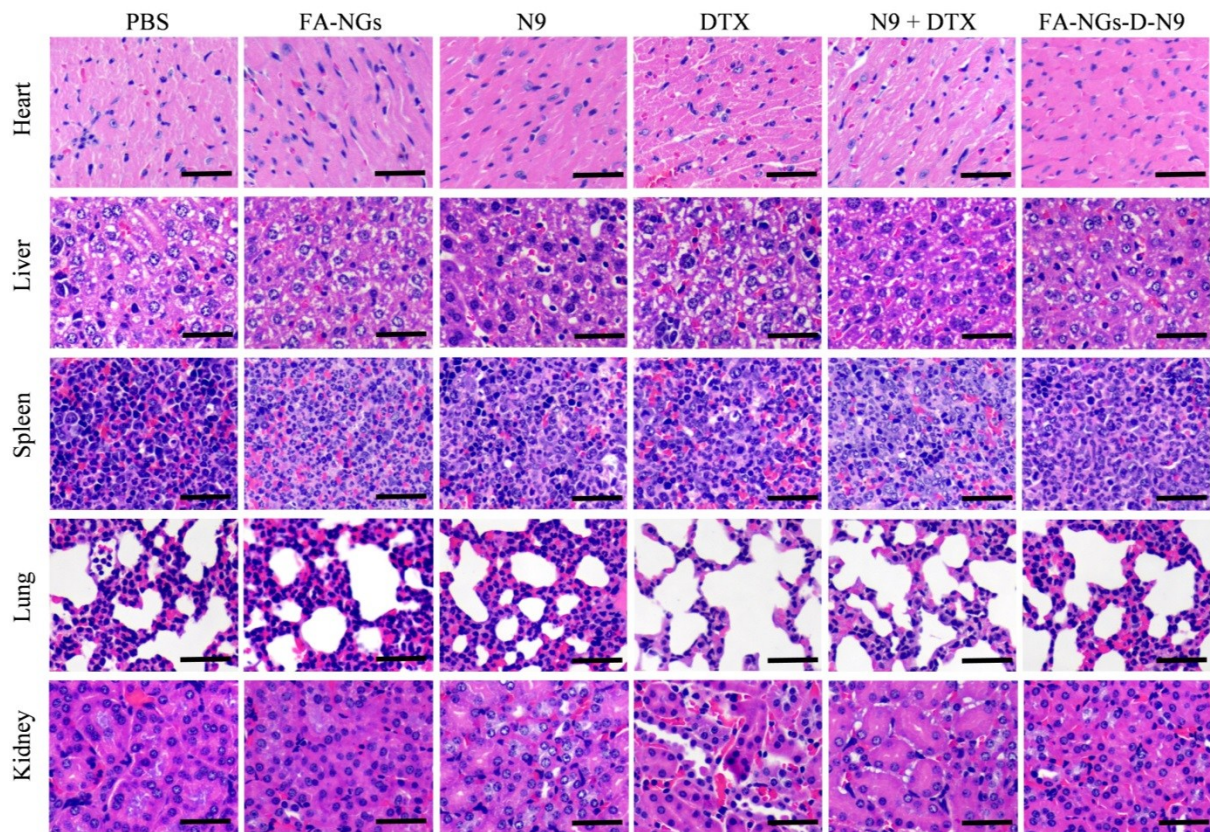

**Fig. S7** HE-stained heart, liver, spleen, lung and kidney sections excised from 4T1-Luc xenograft bearing nude mice following with different treatments for 15 days (the images were observed by an Olympus BX41 microscope at a magnification of 40, scale bar: 50  $\mu$ m).
